# Supplementary material for: Computational Experience with Piecewise-Linear Relaxations for Petroleum Refinery Planning
Source: Preprints.org preprint supplement (doi:10.20944/preprints202103.0131.v1), 2021-03-03
Supplement: Supplementary file 1 [file supplementary]

# Computational Experience with Piecewise-Linear Relaxations for Petroleum Refinery Planning

Zaid Ashraf Rana,<sup>1</sup> Cheng Seong Khor,<sup>1,2\*</sup>

<sup>1</sup>Chemical Engineering Department, Universiti Teknologi PETRONAS, 32610, Seri Iskandar,  
Perak Darul Ridzuan, Malaysia.

<sup>2</sup>Centre for Systems Engineering, Universiti Teknologi PETRONAS, 32610 Seri Iskandar, Perak  
Darul Ridzuan, Malaysia.

\*Corresponding author. E-mail: chengseong.khor@utp.edu.my; khorchengseong@gmail.com

## Supplementary Materials

### Appendix A: Mathematical Formulation

#### A.1. Crude Distillation Unit

Total crude oil feed to CDU is given by:

$$\sum_p Q_{u,p} \leq \sum_{cr} F_{cr}, u = \text{CDU} \quad (\text{A1})$$

where  $F_{cr}$  = flow rate of crude oil type  $cr$  and  $Q_{u,p}$  = flow rate of CDU fraction (i.e., cut)  $p$ .

CDU capacity is described by:

$$L_u \leq cp_u^{\max}, \quad \forall u \in U \quad (\text{A2})$$

where  $L_u$  = load of unit  $u$  and  $cp_u^{\max}$  = maximum capacity of  $u$ .

CDU outlet flow rate of cut  $p$  is given by:

$$Q_{u,p} = L_u W_p, \quad u = \text{CDU}, \quad \forall p \in P \quad (\text{A3})$$

where  $W_p$  = weight transfer ratio of  $p$  that is determined based on true boiling point data of  $cr$ .

Weight transfer ratio of  $p$  sums to unity:

$$\sum_p W_p = 1 \quad (\text{A4})$$

Middle-of-point (or midpoint) weight transfer ratio  $MW_p$  of fraction  $p$  is given by:

$$MW_p = 100 \left( \sum_{p'} W_{p'} + \frac{1}{2} W_p \right), \quad \forall p \in P \setminus \{BR\}. \quad (\text{A5})$$

## A.2. Fluid Catalytic Cracking Unit

CDU cut of bottom residue is fed to FCC to be converted into more valuable products. FCC outlet flow rate of product fraction  $f$  is given by:

$$Q_{\text{FCC},f} = L_{\text{FCC}} Y_f, \quad \forall f \in F \quad (\text{A6})$$

where  $Q_{\text{FCC},f}$  = flow rate of  $f$  from FCC and  $Y_f$  = weight transfer ratio of  $f$  from FCC.

All weight transfer ratios of  $f \in F$  sums to unity:

$$\sum_f Y_f = 1. \quad (\text{A7})$$

$Y_f$  is determined using the following regression-based relation:

$$Y_f = a_f^0 + a_f^1 (\text{conv} - z_f) + a_f^2 (\text{conv} - z_f)^2, \quad \forall f \quad (\text{A8})$$

where regression coefficients given by  $a_f^0$ ,  $a_f^1$ , and  $a_f^2$  are known constants.

To achieve a desired FCC conversion level, part of its outlet flow of total gas oil (TGO) is recycled (as  $Q_p^R$ ) and mixed with total inlet feed ( $Q_u^T$ ):

$$Q_{FCC}^T = Q_{CDU,BR} + Q_{TGO}^R \quad (A9)$$

where  $Q_{FCC}^T$  = total inlet flow rate to FCC,  $Q_{CDU,BR}$  = flow rate of bottom residue (BR) outlet stream from CDU, and  $Q_{TGO}^R$  = flow rate of TGO recycle stream.

FCC load is equal to its inlet flow rate:

$$L_{FCC} = Q_{FCC}^T \quad (A10)$$

TGO recycle stream flow rate are bounded (from above) by the following constraints:

$$Q_{TGO}^R \leq \frac{1}{2} Q_{CDU,BR} \quad (A11)$$

$$Q_{TGO}^R \leq Q_{FCC,FHO}^P \quad (A12)$$

Remaining TGO stream (after split for recycle) is sold as heavy oil (FHO):

$$Q_{FCC,FHO} = Q_{FCC,TGO} - Q_{TGO}^R \quad (A13)$$

where  $Q_{FCC,FHO}$  = flow rate of FHO product from FCC.

### A.3. Gasoline Blending Unit

Lighter CDU fractions of GO and HN are processed further to improve their for gasoline blending to meet required research octane number (RON) specifications:

$$Q_{CDU,p} = \sum_{g \in G} F_{p,g}^P, \quad \forall p \in P_g \quad (A14)$$

where  $F_{p,g}^P$  = flow rate of gasoline product grade  $g$ ,  $G$  = set of gasoline product grades with RON of 90 ( $g_{90}$ ) and 93 ( $g_{93}$ ), and  $P_g$  = set of CDU fractions for gasoline blending.

To improve product quality, additives (e.g., MTBE) are mixed with blended CDU fractions according to the following relation:

$$Q_p^P = \sum_{g \in G} F_{p,g}^P + \sum_r Q_r^A, \quad \forall p \quad (\text{A15})$$

where  $Q_r^A$  = flow rate of additive  $r$  and  $Q_p^P$  = flow rate of final product  $p$ .

FCC gasoline fraction called  $F_{gas}$  is blended to improve its quality. The flow rate of FCC blended fraction equals the sum of flow rates of its respective blended products, as follows:

$$Q_{t,f}^{iprod} = \sum_g F_{f,g}^{iprod}, f = F_{gas} \quad (\text{A16})$$

where  $Q_{t,f}^{fprod}$  is the flow rate of final product fraction  $f$  ( $F_{gas}$ ),  $F_{f,g}^{iprod}$  is the flow rate of intermediate blended product  $g$ , which is produced by blending flow stream  $F_{gas}$  from FCC.

The gasoline final products g90 and g93 are sold to customers. Their flow rates are calculated using equation (A17).

$$Q_g^{fprod} = F_{f,g}^{iprod} + \sum_r F_{r,g}^{iprod} + \sum_p F_{p,g}^{iprod}, f = F_{gas}, p \in P_g, \forall g \quad (\text{A17})$$

where  $Q_g^{fprod}$  represents flow of final product  $g$ .

#### A.4. Diesel Blending Unit

Heavier CDU fractions LD and HD are blended in the DB to improve their properties such as, pour point. Flow rate of each CDU fraction  $p$  to DB equals the sum of flow rates of its respective diesel blended products (d0 and d10). These blended products are called as *iprod*, and modelled using equation (A18).

$$Q_{u,p} = \sum_d F_{p,d}^{iprod}, u = \text{CDU}, \forall p \in P_d \quad (\text{A18})$$

where  $F_{p,d}^{iprod}$  is the flow rate of intermediate product  $d$  from the DB, which is produced by blending feed  $p$  (LD, HD) from the CDU.

The final products d10 and d0, from the DB are sold to customers. Their flow rates are calculated using equation (A19).

$$Q_d^{fprod} = \sum_p F_{p,d}^{iprod}, p \in P_d, \forall d \quad (\text{A19})$$

where  $Q_d^{fprod}$  represents flow rate of final product  $d$  from DB.

#### A.5. Quality Specifications

Octane numbers of light CDU fractions GO and HN and pour points of CDU heavy fractions LD and HD are calculated using property correlations from the literature:

$$Pr_{j,p} = a0_p + a1_p(MW_p - z_p) + a2_p(MW_p - z_p)^2, \forall j, \forall p \in (P_g \cup P_d) \quad (\text{A20})$$

Minimum octane number specifications for gasoline blended product g90 and g93 are given by:

$$\text{RON}_g Q_g^{fprod} \leq Pr_{j,p} F_{p,g}^{iprod} + Pr_{j,r} F_{r,g}^{iprod} + Pr_{j,p'} F_{p',g}^{iprod} + Pr_{j,f} F_{f,g}^{iprod}, \quad (\text{A21})$$

$$j = \text{ON}, p = \text{GO}, p' = \text{HN}, f = \text{Fgas}, \forall g, r$$

where  $\text{RON}_g$  is the research octane number of gasoline blended products g90 and g93.

#### A.6. Demand Requirement

Market demand of final products  $s$  (g90, g93, d0, d10, FHO, C24) is written as:

$$Q_s^{fprod} \leq D_s^{max}, \forall s \quad (\text{A22})$$

where  $D_s^{max}$  is the maximum demand of final product  $s$ .

#### A.7. Variable Bounds

FCC conversion level is bounded by equation (A23).

$$conv^{LO} \leq conv \leq conv^{UP} \quad (A23)$$

#### A.8. Objective Function

The objective function for refinery profit is defined as:

*Profit = Price of valuable products – crude oil cost – additive raw materials cost – operational cost of units*

$$Profit = \sum_s Q_s^{fprod} C_s^{fprod} - \sum_{cr} L_{u'} C_{cr} - \sum_r F_{r,g}^{iprod} C_r - \sum_u L_u C_u, u' = CDU, \forall g \quad (A24)$$

where  $C_s^{fprod}$  is the price of sellable products,  $C_{cr}$  is the cost of crude oil,  $C_r$  is the cost of additive raw materials,  $C_u$  is the operating cost of process unit  $u$ .

## Nomenclature

### Sets

|         |                                                               |
|---------|---------------------------------------------------------------|
| $CR$    | Crude oils                                                    |
| $U$     | Process units {CDU, FCC}                                      |
| $P$     | CDU fractions {GO, HN, LD, HD, BR}                            |
| $P_g$   | Feed to GB {GO, HN}                                           |
| $P_d$   | Feed to DB {LD, HD}                                           |
| $F$     | FCC fractions {Fgas, C24, FHO, Coke}                          |
| $G$     | Products of GB {g90, g93}                                     |
| $D$     | Products of DB {d0, d10}                                      |
| $R$     | Additive raw materials {MTBE}                                 |
| $S$     | Sellable products {g90, g93, d0, d10, C24, FHO}               |
| $J$     | Quality properties, octane number and pour point {ON, PP}     |
| $N$     | Set containing grid-points/number of partitions {1,2,3,...,N} |
| $RON_g$ | Research octane number of GB products {90,93}                 |

### Indices

|         |                                                            |
|---------|------------------------------------------------------------|
| $u, u'$ | Refinery process units                                     |
| $p, p'$ | Material stream from CDU unit                              |
| $f$     | Material stream from FCC unit                              |
| $g$     | Material stream from gasoline blending unit                |
| $d$     | Material stream from diesel oil blending unit              |
| $r$     | Additive raw material stream for improving product quality |
| $s$     | Sellable products                                          |
| $j$     | Property                                                   |

### Parameters

|              |                                               |
|--------------|-----------------------------------------------|
| $cp_u^{max}$ | Maximum capacity of refinery process unit $u$ |
|--------------|-----------------------------------------------|

|                         |                                                            |
|-------------------------|------------------------------------------------------------|
| $F_{cr}$                | Flow rate of crude oil                                     |
| $a0_p, a1_p, a2_p, z_p$ | Correlation coefficients for CDU fractions $p$             |
| $a0_f, a1_f, a2_f, z_f$ | Correlation coefficients for FCC fractions $f$             |
| $C_s^{fprod}$           | Price of sellable product $s$                              |
| $C_r$                   | Cost of additive raw materials $r$                         |
| $C_u$                   | Operating cost of refinery units                           |
| $C_{cr}$                | Cost of crude oil                                          |
| $D_s^{max}$             | Maximum demand of sellable product $s$                     |
| $Pr_{j,r}, Pr_{j,f}$    | Property specification $j$ of material streams $r$ and $f$ |

### Continuous Variables

|                   |                                                                                                                 |
|-------------------|-----------------------------------------------------------------------------------------------------------------|
| $L_u$             | Load of process unit $u$                                                                                        |
| $Q_{u,p}$         | Flow rate of CDU fraction $p$ from process unit $u$                                                             |
| $W_p$             | Weight transfer ratio of CDU fraction $p$                                                                       |
| $Q_f^{fprod}$     | Flow rate FCC final product $f$                                                                                 |
| $Y_f$             | Weight transfer ratio of FCC product streams $f$                                                                |
| conv              | FCC conversion level                                                                                            |
| $Rcy$             | Recycled stream of FCC product FHO                                                                              |
| $Q_t$             | Sum of flow rates of FCC recycle stream and FCC feed                                                            |
| $F_{t,f}^{iprod}$ | Flow rate of FCC intermediate product stream $f$ , which is produced by total mixed feed stream $t$ to FCC unit |
| $F_{p,g}^{iprod}$ | Flow rate of intermediate product stream $g$ (g90, g93) from GB, which is produced by blending CDU fraction $p$ |
| $Q_r$             | Flow rate of additive raw material $r$ to GB to improve blended products quality                                |
| $F_{r,g}^{iprod}$ | Flow rate of stream $g$ (g90, g93) from GB, which is produced by blending additive raw material stream $r$      |
| $Q_g^{fprod}$     | Final products flow rate (g90, g93) from GB                                                                     |



|                   |                                                                                                      |
|-------------------|------------------------------------------------------------------------------------------------------|
| $F_{p,d}^{iprod}$ | Flow rate of intermediate product stream $d$ from DB, which is produced by blending CDU fraction $p$ |
| $Q_d^{fprod}$     | Final products flow rate (d0, d10) from DB                                                           |
| $Q_s^{fprod}$     | Flow of final sellable products $s$                                                                  |
| $MW_p$            | Mid-point weight transfer ratio of CDU fraction $p$                                                  |
| $Pr_{j,p}$        | Property specification $j$ of CDU fraction $p$                                                       |
| $Profit$          | Total profit of the refinery                                                                         |

#### **Other – Subscripts and Superscripts**

|         |                      |
|---------|----------------------|
| $iprod$ | Intermediate product |
| $fprod$ | Final product        |

#### **Abbreviations**

|     |                               |
|-----|-------------------------------|
| CDU | Crude Distillation Unit       |
| FCC | Fluid Catalytic Cracking Unit |
| GB  | Gasoline Blending Unit        |
| DB  | Diesel Oil Blending Unit      |
| GO  | Gross Overhead                |
| HN  | Heavy Naphtha                 |
| LD  | Light Distillate              |
| HD  | Heavy Distillate              |
| BR  | Bottom Residue                |
